# Supplementary material for: DNA damage regulation and its role in drug-related phenotypes in the malaria parasites
Source: PubMed Central journal article supplement (PMC4817041; doi:10.1038/srep23603), 2016-04-01
Supplement: srep23603-s1.pdf [file srep23603-s1.pdf]

## **DNA damage regulation and its role in drug-related phenotypes in the malaria parasites.**

Devendra Kumar Gupta<sup>1</sup>, Alok Tanala Patra<sup>1</sup>, Zhu Lei<sup>1</sup>, Archana Patkar Gupta<sup>1</sup> and Zbynek Bozdech<sup>1,\*</sup>

<sup>1</sup> School of Biological Sciences, Nanyang Technological University, 639798, Singapore

\* To whom correspondence should be addressed. Tel: (65) 63162925; Fax (65) 67913856;  
Email:zbozdech@e.ntu.edu.sg

# Supplementary figure 1

## Pathways up-regulated by MMS ( P value <0.05)

Nucleotide excision repair

Genes coding for enzymes involved in DNA replication

Double strand break repair and homologous recombination

Genes involved in excision-repair

Base excision repair of AP sites

Protein biosynthesis

Initiation of translation

Genes coding for components involved in ribosome assembly

Nuclear genes with mitochondrial signal sequences

Nuclear genes with apicoplast signal sequences

Chaperone-assisted protein folding

S-Glutathionylated proteins

Glycolysis

Pentose Phosphate Cycle

Total palmitome of Plasmodium falciparum

## DNA repair pathways (35 genes)

| MMS |   |   | Cis |   |   | Eto |   |   | TSA |   |   |
|-----|---|---|-----|---|---|-----|---|---|-----|---|---|
| 1   | 2 | 3 | 1   | 2 | 3 | 1   | 2 | 3 | 1   | 2 | 3 |

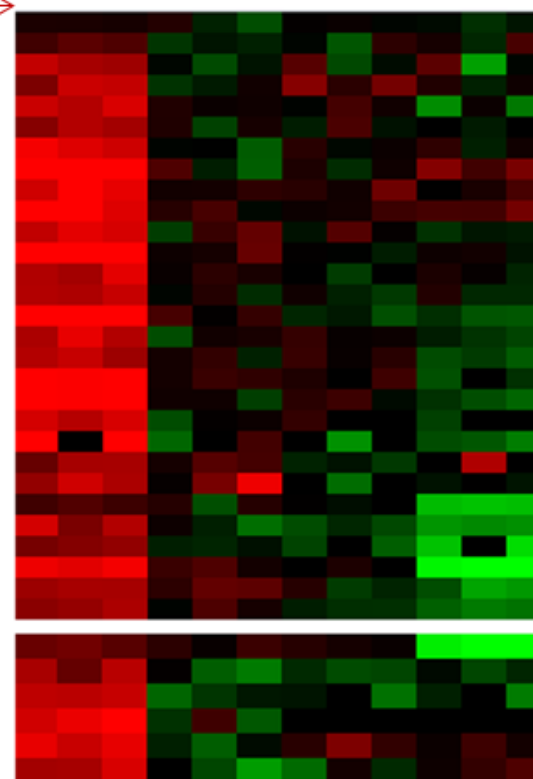

Excision repair  
(29 genes)

DSB repair  
(6 genes)

-4 0 +4  
Log 2 ratios

## Supplementary figure 2

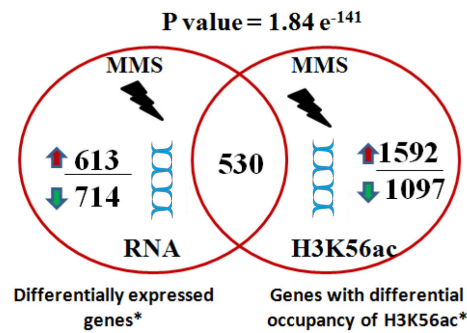

For H3K56ac, 189 genes (out of 530 overlapping) shows positive correlation between MMS induced RNA expression and H3K56ac

### Enriched functional groups ( p value < 0.05)

|                                                              |
|--------------------------------------------------------------|
| S-Glutathionylated proteins                                  |
| Nuclear genes with mitochondrial signal sequences            |
| Modification of proteins by adenylation and ADP-ribosylation |
| Maturation and export of 60S and 40S ribosomal subunits      |
| Genes coding for components involved in ribosome assembly    |
| CoA biosynthesis                                             |
| Chaperone-assisted protein folding                           |
| Asparagine and Aspartate metabolism                          |



**Table 1** SNP's identified in Dd2, W2 and D6 clones. Table shows the total no of single nucleotide polymorphism detected within Intron and exon (synonymous and non-synonymous SNP's) among D6, Dd2 and W2. The reference genome is 3D7. (\*ns-SNP is non synonym single nucleotide polymorphism, \*\*s-SNP is synonym single nucleotide polymorphism)

|                    | <b>Dd2</b>               | <b>W2</b>                | <b>D6</b>                |
|--------------------|--------------------------|--------------------------|--------------------------|
| Intron-SNP         | 1523                     | 1628                     | 1497                     |
| Exon-s-SNP         | 2900                     | 2812                     | 2973                     |
| <b>Exon-ns-SNP</b> | <b>6550 (2099 genes)</b> | <b>6725 (2088 genes)</b> | <b>6278 (1942 genes)</b> |
| Total Intra-SNP    | 10973                    | 11165                    | 10748                    |

Reference genome : 3D7

Map score > 30

**Table 2 SNP's identified in DNA repair genes among Dd2, W2 and D6 clones.** These are 57 DNA repair genes which have non-synonymous SNP within coding region. The reference genome is 3D7.

| Gene ID       | Description                                        | Dd2 | W2 | D6 |
|---------------|----------------------------------------------------|-----|----|----|
| PF3D7_0726300 | DNA mismatch repair protein PMS1, putative         | 18  | 13 | 4  |
| PF3D7_1244200 | transcription factor Tfb2, putative                | 11  | 11 | 10 |
| PF3D7_1303800 | conserved Plasmodium protein, unknown function     | 7   | 6  | 2  |
| PF3D7_1368800 | DNA repair endonuclease, putative                  | 7   | 6  | 8  |
| PF3D7_1368800 | DNA repair endonuclease, putative                  | 6   | 6  | 8  |
| PF3D7_1037000 | DNA polymerase zeta catalytic subunit, putative    | 5   | 5  | 5  |
| PF3D7_0509500 | conserved Plasmodium protein, unknown function     | 5   | 5  | 0  |
| PF3D7_0514100 | ATP-dependent DNA helicase UvrD                    | 5   | 5  | 5  |
| PF3D7_0310500 | DEAD box helicase, putative                        | 4   | 4  | 3  |
| PF3D7_0504200 | ATP-dependent helicase, putative                   | 4   | 4  | 0  |
| PF3D7_0605800 | DNA repair protein RAD50, putative                 | 4   | 2  | 12 |
| PF3D7_0820000 | Snf2-related CBP activator, putative               | 3   | 3  | 2  |
| PF3D7_1455300 | conserved Plasmodium protein, unknown function     | 3   | 3  | 1  |
| PF3D7_0910500 | DNA repair protein REV1, putative                  | 3   | 3  | 2  |
| PF3D7_1316900 | conserved Plasmodium protein, unknown function     | 2   | 2  | 0  |
| PF3D7_0710400 | nucleotide excision repair protein, putative       | 2   | 2  | 2  |
| PF3D7_1363500 | DNase I-like protein, putative                     | 2   | 2  | 1  |
| PF3D7_1449700 | exosome complex exonuclease RRP6, putative         | 2   | 2  | 2  |
| PF3D7_1471600 | conserved Plasmodium protein, unknown function     | 2   | 2  | 3  |
| PF3D7_0204800 | 3'-5' exonuclease, putative                        | 2   | 2  | 1  |
| PF3D7_0409600 | replication protein A1, large subunit              | 2   | 2  | 0  |
| PF3D7_0411900 | DNA polymerase alpha                               | 2   | 2  | 0  |
| PF3D7_0513600 | deoxyribodipyrimidine photo-lyase, putative        | 2   | 2  | 9  |
| PF3D7_0630300 | DNA polymerase epsilon, catalytic subunit a        | 2   | 2  | 3  |
| PF3D7_0908000 | P1 nuclease, putative                              | 2   | 2  | 0  |
| PF3D7_1250800 | DNA repair protein rhp16, putative                 | 2   | 2  | 3  |
| PF3D7_1331100 | DEAD box helicase, putative                        | 1   | 1  | 2  |
| PF3D7_1343400 | DNA repair protein RAD5, putative                  | 1   | 1  | 0  |
| PF3D7_1304100 | DNA ligase I                                       | 1   | 1  | 1  |
| PF3D7_1362500 | exonuclease, putative                              | 1   | 1  | 3  |
| PF3D7_1314900 | TFIIH basal transcription factor subunit, putative | 1   | 1  | 0  |
| PF3D7_0710100 | conserved Plasmodium protein, unknown function     | 1   | 1  | 0  |
| PF3D7_0803400 | DNA repair protein RAD54, putative                 | 1   | 1  | 1  |
| PF3D7_1003700 | conserved Plasmodium protein, unknown function     | 1   | 1  | 0  |
| PF3D7_1010200 | DNA2/NAM7 helicase, putative                       | 1   | 1  | 0  |
| PF3D7_1106000 | RuvB-like helicase 2                               | 1   | 1  | 0  |

|               |                                                    |   |   |   |
|---------------|----------------------------------------------------|---|---|---|
| PF3D7_1332100 | conserved Plasmodium protein, unknown function     | 1 | 1 | 2 |
| PF3D7_1337300 | exoribonuclease, putative                          | 1 | 1 | 1 |
| PF3D7_1411400 | plastid replication-repair enzyme                  | 1 | 1 | 2 |
| PF3D7_1429900 | ATP-dependent DNA helicase, putative               | 1 | 1 | 0 |
| PF3D7_1430600 | exodeoxyribonuclease III, putative                 | 1 | 0 | 0 |
| PF3D7_1432600 | conserved Plasmodium protein, unknown function     | 1 | 1 | 1 |
| PF3D7_1449700 | exosome complex exonuclease RRP6, putative         | 1 | 2 | 2 |
| PF3D7_0107800 | double-strand break repair protein MRE11, putative | 1 | 1 | 0 |
| PF3D7_0111300 | replication factor c protein, putative             | 1 | 1 | 1 |
| PF3D7_0206000 | DNA repair endonuclease, putative                  | 1 | 1 | 1 |
| PF3D7_0216000 | DEAD/DEAH box helicase, putative                   | 1 | 1 | 2 |
| PF3D7_0305600 | AP endonuclease , putative                         | 1 | 1 | 0 |
| PF3D7_0416400 | histone acetyltransferase, putative                | 1 | 1 | 3 |
| PF3D7_0505500 | DNA mismatch repair protein MSH6, putative         | 1 | 1 | 2 |
| PF3D7_0604600 | DNA helicase, putative                             | 1 | 1 | 1 |
| PF3D7_0614800 | endonuclease III homologue, putative               | 1 | 1 | 0 |
| PF3D7_0628600 | conserved Plasmodium protein, unknown function     | 1 | 1 | 0 |
| PF3D7_0917100 | N-glycosylase/DNA lyase, putative                  | 1 | 1 | 3 |
| PF3D7_0934100 | DNA excision-repair helicase, putative             | 1 | 1 | 0 |
| PF3D7_1215700 | conserved Plasmodium protein, unknown function     | 1 | 1 | 1 |
| PF3D7_1235900 | pre-mRNA-splicing factor SYF1, putative            | 1 | 1 | 5 |

**Table 3** Comparison of DNA damage sensors among mammals, yeast and *P. falciparum*.

- DNA excision repair
- Double strand break repair
- Direct repair

| Repair Mechanisms                               | Mammals                                               | Yeast                          | <i>Plasmodium falciparum</i>                                               | No of homologues in <i>P.falciparum</i> | MMS induced upregulation in <i>P.falciparum</i> * |
|-------------------------------------------------|-------------------------------------------------------|--------------------------------|----------------------------------------------------------------------------|-----------------------------------------|---------------------------------------------------|
| Base Excision (BER)                             | DNA glycosylase                                       | DNA glycosylase                | PF3D7_1129500, PF3D7_1415000, PF3D7_1467100, PF3D7_0917100                 | 4                                       | PF3D7_1129500, PF3D7_0917100                      |
| Nucleotide Excision (NER)                       | XPC-hHR23B complex                                    | Rad4-Rad-23 complex            | PF3D7_1432600 (XPC)<br>PF3D7_1011700 (Rad23)                               | XPC-1<br>Rad23-1                        | PF3D7_1432600 (XPC)<br>PF3D7_1011700 (Rad23)      |
| Mismatch repair (MMR)                           | hMut $\alpha$ (MSH2-MSH6)<br>hMut $\beta$ (MSH2-MSH3) | MSH1-MSH3, MSH6                | PfMSH2-1(PF3D7_1427500), PfMSH2-2 (PF3D7_0706700) . PfMSH6 (PF3D7_0505500) | MSH2-2<br>MSH6-1<br>MSH3-Absent         | PfMSH2-1(PF3D7_1427500)                           |
| Homologous Recombination (HR)                   | MRE11-RAD50-NBS1 (MRN complex)                        | Mre11-Rad50-Xrs2 (MRX complex) | PF3D7_0107800(MRE11)-PF3D7_0605800 (Rad50)                                 | MRE11-1<br>PfRAD50-1<br>NBS1-Absent     | PF3D7_0107800(MRE11)-PF3D7_0605800 (Rad50)        |
| Non homologous recombination end joining (NHEJ) | Ku 70/80 complex                                      | Ku 70/80 complex               | Alternative NHEJ                                                           | Absent                                  |                                                   |
| Single strand break (SSBR)                      | Replication binding protein - 1(RPA-1)                | Rfa1                           | PF3D7_0409600, PF3D7_0904800                                               | 2                                       | PF3D7_0409600                                     |



|                                                       |                             |                         |                                   |    |               |
|-------------------------------------------------------|-----------------------------|-------------------------|-----------------------------------|----|---------------|
| AlkBH                                                 | AlkB homologue family *     | AlkB homologue family * | ND                                | ND |               |
| DNA photolyase (UV induced photo reactivation repair) | Absent in placental mammals | DNA photolyases ( Phr1) | PF3D7_0513600<br>(DNA photolyase) | 1  | PF3D7_0513600 |
| O<br>6Methylguanine-DNA methyltransferase (MGMT)      | MGMT                        | MGMT                    | ND                                | ND |               |

ND - Not defined, \* genes significantly up-regulated (p value < 0.05)

**Table 4** Mapping of parasite age, hpi (hours post invasion) compared to *in vitro* IDC transcriptome of Dd2.

| Samples                                  | Maximum Correlation | Time Point |
|------------------------------------------|---------------------|------------|
| Cisplatin_replicate 1_post 6 hours       | 0.64                | 38 hpi     |
| Cisplatin_replicate 2_post 6 hours       | 0.73                | 38 hpi     |
| DMF_replicate 1_post 6 hours             | 0.75                | 38 hpi     |
| DMF_replicate 2_post 6 hours             | 0.75                | 38 hpi     |
| Etoposide_replicate 1_post 6 hours       | 0.73                | 40 hpi     |
| Etoposide_replicate 2_post 6 hours       | 0.72                | 38 hpi     |
| DMSO_replicate 1_post 6 hours            | 0.76                | 38 hpi     |
| DMSO_replicate 2_post 6 hours            | 0.75                | 38 hpi     |
| TSA_replicate 1_post 6 hours             | 0.59                | 38 hpi     |
| TSA_replicate 2_post 6 hours             | 0.58                | 38 hpi     |
| Control for MMS_replicate 1_post 6 hours | 0.83                | 38 hpi     |
| Control for MMS_replicate 2_post 6 hours | 0.84                | 38 hpi     |
| MMS_replicate 1_post 6 hours             | 0.55                | 30 hpi     |
| MMS_replicate 2_post 6 hours             | 0.56                | 30 hpi     |

DMF is vector control for cisplatin, DMSO is vector control for etoposide and TSA. MMS is dissolved in RPMI.

Supplementary figure 1. **Upregulation of DNA damage repair genes in MMS treated *P. falciparum*.** Functional enrichment analysis of genes upregulated by 6 hr treatment with 0.05% MMS. The Gene Set Enrichment Analysis (GSEA) was used to identify the functional pathways enriched amongst the sets of upregulated genes with statistical significance P value <0.05. The heat map represents relative mRNA abundance values for 29 and 6 genes involved in excision and DSBR in the *P. falciparum* cells treated with the four DNA damaging agents. (For details, see materials and methods section.)

Supplementary figure 2. **Correlation analysis between MMS induced gene expression and H3K56ac.** The Venn diagram depicts the overlap between the 1327 genes were differentially expressed (714 down and 613 up-regulated) and 2689 genetic loci (corr. microarray probes) with differential occupancy of H3K56ac as a result of MMS (P value <0.05). The 530 genes showed differential expression and H3K56ac occupancy which accounts for a statistically overlap; P value 1.84e-141. From these, 189 genes showed increased expression and increased H3K56ac occupancy. The list indicates functional pathways enriched in the set of 189 genes (P value <0.05).

Supplementary figure 3. **Western blot analysis of histone modifications abundance in ARMD and non-ARMD *P. falciparum* strains.** The ARMD (Dd2) and non-ARMD (3D7) strains of *P. falciparum* were treated with MMS (0.05%) for 2hr and 6hr at two developmental stages (trophozoite and schizont). The changes in the overall abundance of histone marks were monitored in the total cell lysates using specific antibody in western blot analysis. Specific antibody against HDAC and H4 were used as loading controls.
